# Supplementary material for: Metformin Improves Functional Outcomes, Activates Neural Precursor Cells, and Modulates Microglia in a Sex-Dependent Manner After Spinal Cord Injury
Source: PubMed Central journal article supplement (PMC10267579; doi:10.1093/stcltm/szad030), 2023-05-20
Supplement: szad030_suppl_supplementary_material.pdf [file szad030_suppl_supplementary_material.pdf]

|                                      | <b>Sham</b>    |                | <b>SCI</b>   |                | <b>SCI + Met</b> |                |
|--------------------------------------|----------------|----------------|--------------|----------------|------------------|----------------|
| <b>Analysis</b>                      | <i>Males</i>   | <i>Females</i> | <i>Males</i> | <i>Females</i> | <i>Males</i>     | <i>Females</i> |
| <i>Immediate Behaviour (Ladder)</i>  | n=12           | n=13           | n=8          | n=6            | n=6              | n=13           |
| <i>Immediate Behaviour (Catwalk)</i> | n=7            | n=6            | n=11         | n=7            | n=8              | n=9            |
| <i>NSPC lineage tracking</i>         | n=3            | n=3            | n=6          | n=3            | n=5              | n=3            |
| <i>OPC lineage tracking</i>          | n=4            | n=6            | n=3          | n=4            | n=3              | n=4            |
| <i>Microglia analyses</i>            | n=3            | n=6            | n=4          | n=5            | n=7              | n=6            |
| <i>Delayed Behaviour (Ladder)</i>    | n=7            | n=11           | n=9          | n=6            | n=10             | n=9            |
| <i>Delayed Behaviour (Catwalk)</i>   | n=7            | n=11           | n=9          | n=6            | n=10             | n=9            |
|                                      | <b>Vehicle</b> |                |              | <b>Met</b>     |                  |                |
| <b>Analysis</b>                      | <i>Males</i>   | <i>Females</i> |              | <i>Males</i>   | <i>Females</i>   |                |
| <i>In vitro analysis</i>             | n=9            | n=9            |              | n=9            | n=9              |                |

**Supplemental Table 1:** Summary of number of mice for all analyses

A

Combined

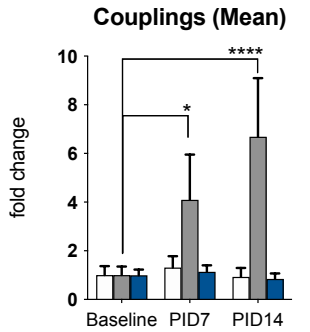

B

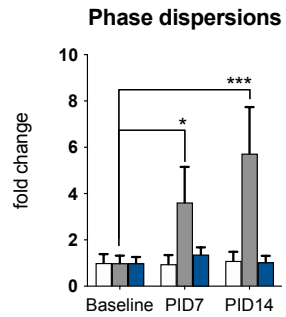

C

Females

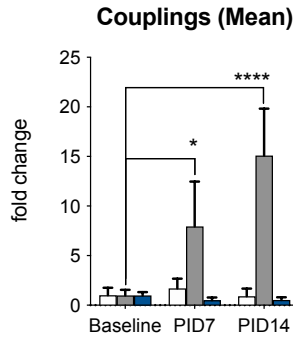

D

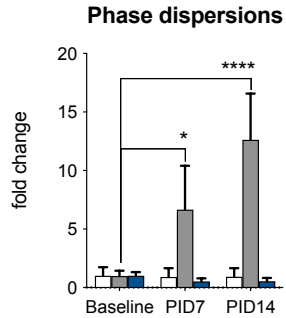

E

Males

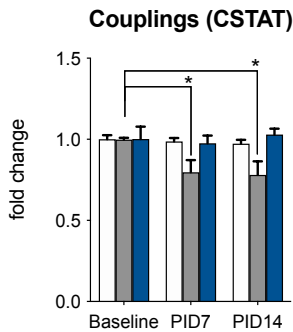

F

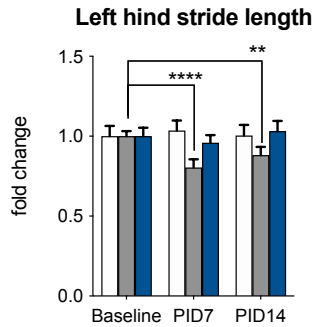

A

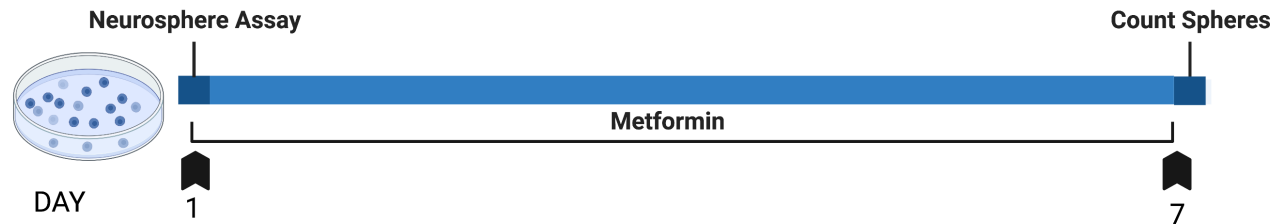

B

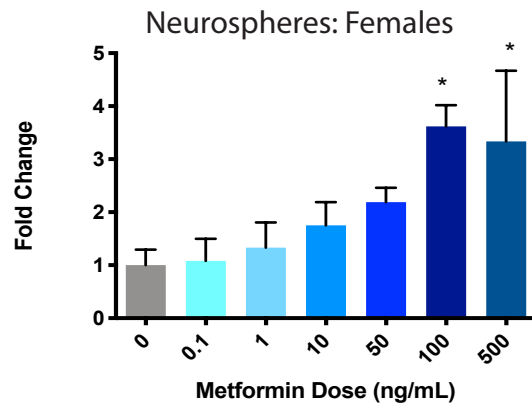

C

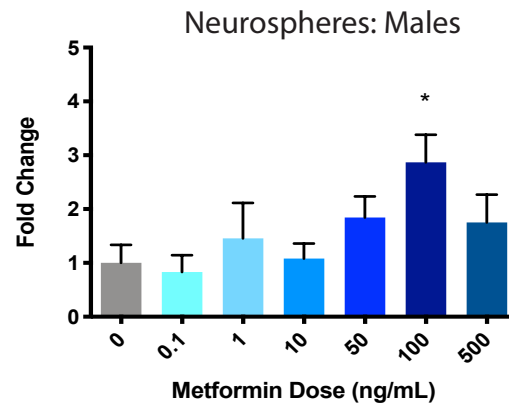

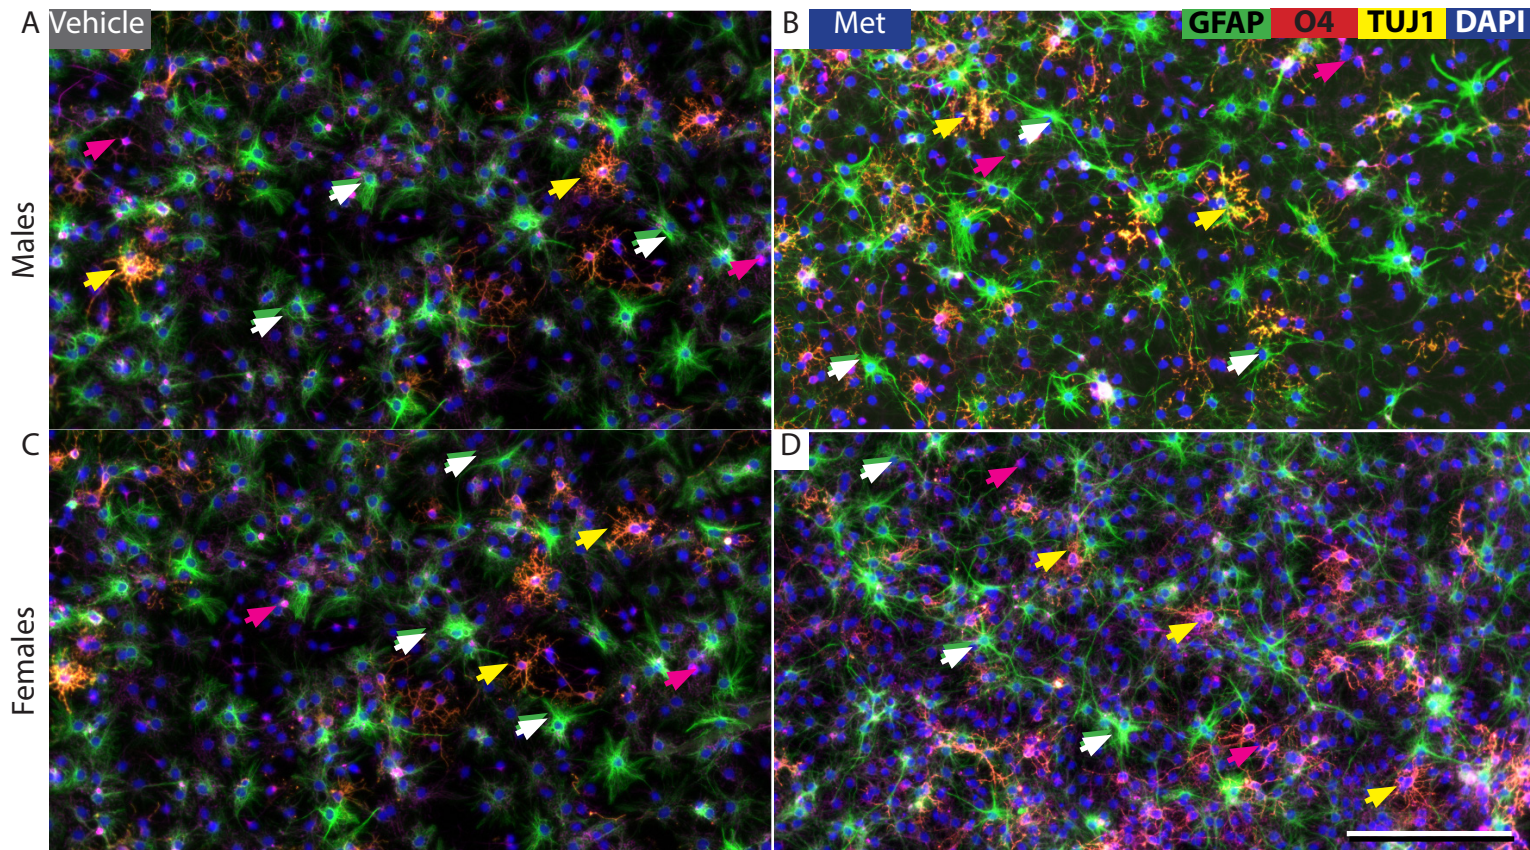

**A** **Females:** EdU+/TdTomato+ cells in dorsal cord

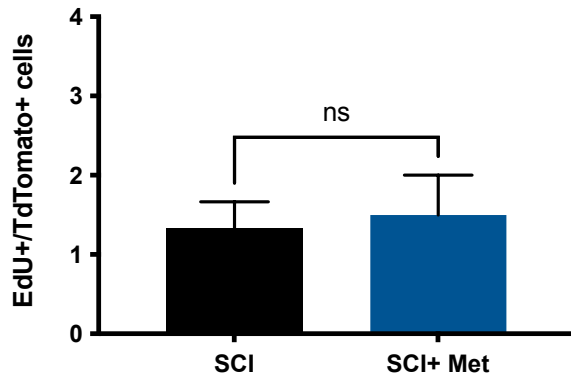

**B** **Males:** EdU+/TdTomato+ cells in dorsal cord

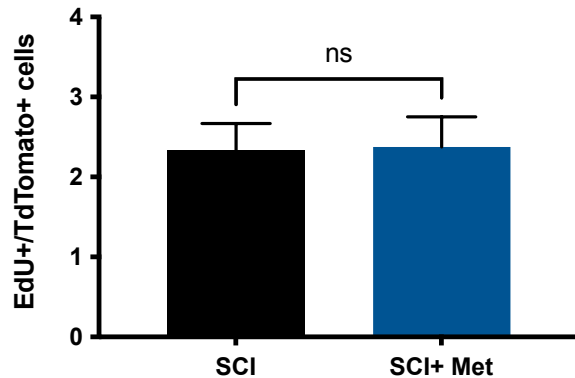

**Supplemental Fig 1: Immediate metformin improves gait following SCI.** Deficits in gait were observed in SCI mice in our acute studies. Mice that received metformin treatment (SCI+Met) were not impaired in any of these gait parameters at PID7 or PID14. **(A,B)** In our combined groups, mean couplings **(A)** and phase dispersion **(B)** were significantly impaired in SCI, but not SCI+Met mice. **(C, D)** Females had significant deficits in mean couplings **(C)** and phase dispersion **(D)** in SCI, but not SCI+Met mice. **(E,F)** Males demonstrated significant deficits in couplings (CSTAT) **(E)** and left hind stride length **(F)** in SCI, but not SCI+Met mice. Data are presented as mean  $\pm$  SEM; n=18-25/group including males and females; in data split by sex, n=6-11/group. \*p<0.05.

**Supplemental Fig. 2: *In vitro* dose-response curves for metformin.** **(A)** *In vitro* experimental timeline. **(B)** *In vitro* delivery of metformin in females reveals a significant increase in the number of neurospheres at both 100ng/mL and 500ng/mL. **(C)** In males, a significant increase in the number of neurospheres is observed at 100ng/mL metformin. n=9 mice/group \*p<0.05

**Supplemental Fig. 3: Neurospheres are multi-potent in both males and females in the presence or absence of metformin.** **(A)** male, vehicle. **(B)** male, metformin. **(C)** female, vehicle. **(D)** female, metformin. Scale bar in D= 200 $\mu$ m, n=12 neurospheres/group from 9 mice.

**Supplemental Fig. 4: Rare Edu+/TdTomato+ cells are observed in the dorsal spinal cord in females and males.** (A,B) There is no significant difference in Edu+/TdTom+ cells in the dorsal (injured) spinal cord in females (A) or males (B) between SCI and SCI+Met treated mice. Data are presented as mean  $\pm$  SEM; n=3-4 mice/group.
